# Supplementary material for: Trends in decompensated cirrhosis and hepatocellular carcinoma among people with a hepatitis B notification in New South Wales
Source: PubMed Central journal article supplement — JHEP Rep. 2022 Aug 6;4(10):100552. doi: 10.1016/j.jhepr.2022.100552 (PMC9478454; doi:10.1016/j.jhepr.2022.100552), 2022-08-06
Supplement: mmc1.pdf [file mmc1.pdf]

# **Trends in decompensated cirrhosis and hepatocellular carcinoma among people with a hepatitis B notification in New South Wales**

Syed Hassan Bin Usman Shah, Maryam Alavi, Behzad Hajarizadeh, Gail V. Matthews, Marianne Martinello, Mark Danta, Janaki Amin, Matthew G. Law, Jacob George, Heather Valerio, Gregory J. Dore

## Table of contents

|               |   |
|---------------|---|
| Table S1..... | 2 |
| Table S2..... | 2 |
| Table S3..... | 3 |
| Table S4..... | 4 |
| Fig. S1.....  | 5 |
| Fig. S2.....  | 5 |

**Table S1: Time from HBV notification to decompensated cirrhosis diagnosis among people with alcohol use disorder (2000-2018), n=379**

|                                 | HBV mono             |                        |                         | HBV/HCV           |                        |                         |
|---------------------------------|----------------------|------------------------|-------------------------|-------------------|------------------------|-------------------------|
|                                 | All<br>n= 196<br>(%) | 2001-2009<br>n= 93 (%) | 2010-2018<br>n= 103 (%) | All<br>n= 183 (%) | 2001-2009<br>n= 72 (%) | 2010-2018<br>n= 111 (%) |
| ≥5 years before DC <sup>a</sup> | 95 (48)              | 34 (37)                | 61 (59)                 | 110 (60)          | 33 (46)                | 77 (69)                 |
| 2-5 years before DC             | 29 (15)              | 21 (22)                | 8 (8)                   | 27 (15)           | 13 (18)                | 14 (13)                 |
| 0-2 years before DC*            | 30 (16)              | 18 (19)                | 12 (12)                 | 15 (8)            | 8 (11)                 | 7 (6)                   |
| After/at DC                     | 42 (21)              | 20 (22)                | 22 (21)                 | 31 (17)           | 18 (25)                | 13 (12)                 |

\*combined 2 categories in T1 Supp, small cells

DC, Decompensated cirrhosis; HBV, Hepatitis B virus; HCV, Hepatitis C virus.

**Table S2: Interaction between LHD of residence and HCV co-infection, in the adjusted model for factors associated with decompensated cirrhosis diagnosis (2009-2018) among people with an HBV notification (1993-2017) (n=668)**

| Characteristic, n %    | DC<br>n=668 <sup>#</sup> | aHR  | 95% CI | 95% CI | P      |
|------------------------|--------------------------|------|--------|--------|--------|
| Rural*HBV mono         | 61 (1)                   | 1.00 |        |        |        |
| Outer metro*HBV mono   | 235 (1)                  | 1.28 | 0.94   | 1.73   | 0.108  |
| Metro*HBV mono         | 194 (1)                  | 1.07 | 0.79   | 1.45   | 0.647  |
| Rural*HBV/HCV co       | 49 (5)                   | 2.08 | 1.42   | 3.05   | <0.001 |
| Outer metro*HBV/HCV co | 77 (5)                   | 2.42 | 1.73   | 3.40   | <0.001 |
| Metro*HBV/HCV co       | 41 (4)                   | 1.74 | 1.17   | 2.59   | 0.006  |

<sup>#</sup>8 people with HBV/HIV co-infection were included in all adjusted models, but not displayed due to small numbers

DC, Decompensated cirrhosis; aHR, adjusted Hazard ratio; HBV, Hepatitis B virus; HCV, Hepatitis C virus

\*interaction was adjusted for birth cohort, sex, ethnicity, country of birth, alcohol use disorder and Charlson Comorbidity Index  
Levels of significance: p < 0.05 (cox proportional hazards regression analyses)

**Table S3. Unadjusted analysis, evaluating factors associated with late HBV notification among people with decompensated cirrhosis and hepatocellular carcinoma, n=668**

| Characteristic, n %                              | Late HBV notification (DC), n=187 | OR   | 95% CI     | Late HBV notification (HCC), n=152 | OR   | 95% CI     |
|--------------------------------------------------|-----------------------------------|------|------------|------------------------------------|------|------------|
| Age at HBV notification, by median               |                                   |      |            |                                    |      |            |
| <47 years                                        | 57 (17)                           | 1.00 |            | 34 (11)                            | 1.00 |            |
| ≥47 years                                        | 130 (38)                          | 2.96 | 2.07, 4.25 | 118 (39)                           | 4.91 | 3.21, 7.50 |
| Sex                                              |                                   |      |            |                                    |      |            |
| Female                                           | 47 (29)                           | 1.00 |            | 24 (23)                            | 1.00 |            |
| Male                                             | 140 (28)                          | 0.93 | 0.62, 1.37 | 128 (26)                           | 1.15 | 0.69, 1.89 |
| Aboriginal and Torres Strait Islander *          |                                   |      |            |                                    |      |            |
| No                                               | 178 (30)                          | 1.00 |            | -                                  | -    | -          |
| Yes                                              | 8 (12)                            | 0.33 | 0.15, 0.71 |                                    |      |            |
| Country of birth                                 |                                   |      |            |                                    |      |            |
| Australia                                        | 57 (25)                           | 1.00 |            | 20 (25)                            | 1.00 |            |
| Americas/ Europe, New Zealand                    | 27 (26)                           | 1.05 | 0.62, 1.79 | 19 (26)                            | 1.05 | 0.50, 2.18 |
| Africa                                           | 7 (35)                            | 1.92 | 0.71, 5.18 |                                    |      |            |
| East Asia                                        | 35 (30)                           | 1.30 | 0.79, 2.14 | 50 (26)                            | 1.07 | 0.59, 1.96 |
| Oceania and Southeast Asia                       | 50 (31)                           | 1.33 | 0.85, 2.08 | 51 (24)                            | 0.94 | 0.52, 1.71 |
| Western Asia                                     | 9 (26)                            | 1.04 | 0.46, 2.35 | 6 (23)                             | 0.90 | 0.31, 2.55 |
| Co-infection with HCV                            |                                   |      |            |                                    |      |            |
| No                                               | 150 (30)                          | 1.00 |            | 133 (26)                           | 1.00 |            |
| Yes                                              | 37 (21)                           | 0.61 | 0.41, 0.93 | 19 (22)                            | 0.81 | 0.46, 1.39 |
| LHD of residence at the time of HBV notification |                                   |      |            |                                    |      |            |
| Rural NSW                                        | 27 (25)                           | 1.00 |            | 14 (26)                            | 1.00 |            |
| Outer metro NSW                                  | 88 (28)                           | 1.20 | 0.73, 1.98 | 72 (25)                            | 0.90 | 0.46, 1.76 |
| Metro NSW                                        | 69 (29)                           | 1.27 | 0.76, 2.14 | 65 (26)                            | 0.96 | 0.49, 1.88 |
| History of alcohol-use disorder                  |                                   |      |            |                                    |      |            |
| No                                               | 132 (29)                          | 1.00 |            | 132 (25)                           | 1.00 |            |
| Yes                                              | 55 (26)                           | 0.83 | 0.57, 1.20 | 20 (27)                            | 1.09 | 0.63, 1.90 |
| Period of DC/HCC diagnosis                       |                                   |      |            |                                    |      |            |
| ≤ 2013                                           | 108 (33)                          | 1.00 |            | 82 (28)                            | 1.00 |            |
| ≥ 2014                                           | 79 (23)                           | 0.59 | 0.42, 0.83 | 70 (22)                            | 0.75 | 0.50, 1.05 |

DC, Decompensated cirrhosis; HCC, Hepatocellular carcinoma; OR, Odds ratio; HBV, Hepatitis B virus; HCV, Hepatitis C virus; LHD, Local Health District; CI, Confidence Interval

\*not shown, small n (<5)

Levels of significance: p < 0.20 (logistic regression analysis)

**Table S4. Unadjusted analysis, evaluating factors associated with decompensated cirrhosis and hepatocellular carcinoma diagnosis (2009-2018) among people with an HBV notification (1993-2017), n=60,660**

| Characteristic, n %                   | DC      |       |              | HCC     |       |              |
|---------------------------------------|---------|-------|--------------|---------|-------|--------------|
|                                       | n=668*  | HR    | 95% CI       | n=606*  | HR    | 95% CI       |
| Birth cohort                          |         |       |              |         |       |              |
| Born ≥1965                            | 167 (1) | 1.00  |              | 94 (<1) | 1.00  |              |
| Born 1945-1964                        | 381 (2) | 4.15  | 3.45, 4.99   | 386 (2) | 7.30  | 5.83, 9.16   |
| Born ≤1944                            | 120 (2) | 7.55  | 5.97, 9.55   | 125 (3) | 13.68 | 10.47, 17.87 |
| Sex                                   |         |       |              |         |       |              |
| Female                                | 161 (1) | 1.00  |              | 104 (1) | 1.00  |              |
| Male                                  | 505 (2) | 2.59  | 2.18, 3.09   | 498 (2) | 4.01  | 3.25, 4.95   |
| Aboriginal and Torres Strait Islander |         |       |              |         |       |              |
| No                                    | 599 (1) | 1.00  |              | 576 (1) | 1.00  |              |
| Yes                                   | 65 (3)  | 2.19  | 1.70, 2.82   | 17 (1)  | 0.57  | 0.35, 0.93   |
| Country of birth                      |         |       |              |         |       |              |
| Australia                             | 229 (3) | 1.00  |              | 80 (1)  | 1.00  |              |
| Americas, Europe, New Zealand         | 104 (3) | 0.99  | 0.78, 1.24   | 73 (2)  | 2.03  | 1.48, 2.79   |
| Africa                                | 18 (1)  | 0.43  | 0.27, 0.71   | 20 (1)  | 1.48  | 0.91, 2.42   |
| East Asia                             | 116 (1) | 0.33  | 0.26, 0.41   | 188 (2) | 1.68  | 1.29, 2.18   |
| Oceania and Southeast Asia            | 163 (1) | 0.46  | 0.38, 0.56   | 213 (2) | 1.73  | 1.34, 2.23   |
| Western Asia                          | 35 (1)  | 0.43  | 0.30, 0.62   | 26 (1)  | 1.02  | 0.66, 1.58   |
| Co-infection with HCV                 |         |       |              |         |       |              |
| No                                    | 494 (1) | 1.00  |              | 518 (1) | 1.00  |              |
| Yes                                   | 174 (4) | 5.55  | 4.68, 6.59   | 87 (2)  | 2.68  | 2.15, 3.36   |
| LHD of residence at HBV               |         |       |              |         |       |              |
| Rural NSW                             | 110 (2) | 1.00  |              | 53 (1)  | 1.00  |              |
| Outer metro NSW                       | 312 (1) | 0.61  | 0.49, 0.75   | 293 (1) | 1.20  | 0.90, 1.61   |
| Metro NSW                             | 235 (1) | 0.48  | 0.39, 0.61   | 225 (1) | 1.11  | 0.82, 1.49   |
| History of alcohol-use disorder       |         |       |              |         |       |              |
| No                                    | 453 (1) | 1.00  |              | 530 (1) | 1.00  |              |
| Yes                                   | 215 (9) | 14.48 | 12.32, 17.01 | 75 (3)  | 4.10  | 3.23, 5.22   |
| †Charlson Comorbidity Index           |         |       |              |         |       |              |
| 0                                     | 225 (1) | 1.00  |              | 292 (1) | 1.00  |              |
| 1-2                                   | 169 (4) | 5.84  | 4.79, 7.13   | 99 (2)  | 2.58  | 2.05, 3.24   |
| 3+                                    | 274 (9) | 17.13 | 14.38, 20.40 | 210 (7) | 10.26 | 8.60, 12.24  |

\*8 people with HBV/HIV co-infection were included in all adjusted models, but not displayed due to small numbers

DC, Decompensated cirrhosis; HCC, Hepatocellular carcinoma; HR, Hazard ratio; HCV, Hepatitis C virus; LHD, Local Health District; NSW, New South Wales; CI, Confidence Interval

†Charlson Comorbidity Index score indicates degree of health; higher scores indicate worse health condition

Levels of significance:  $p < 0.05$  (cox proportional hazards regression analyses)

**Fig. S1. Sensitivity analysis of ESLD rates counting time at risk from 2005**

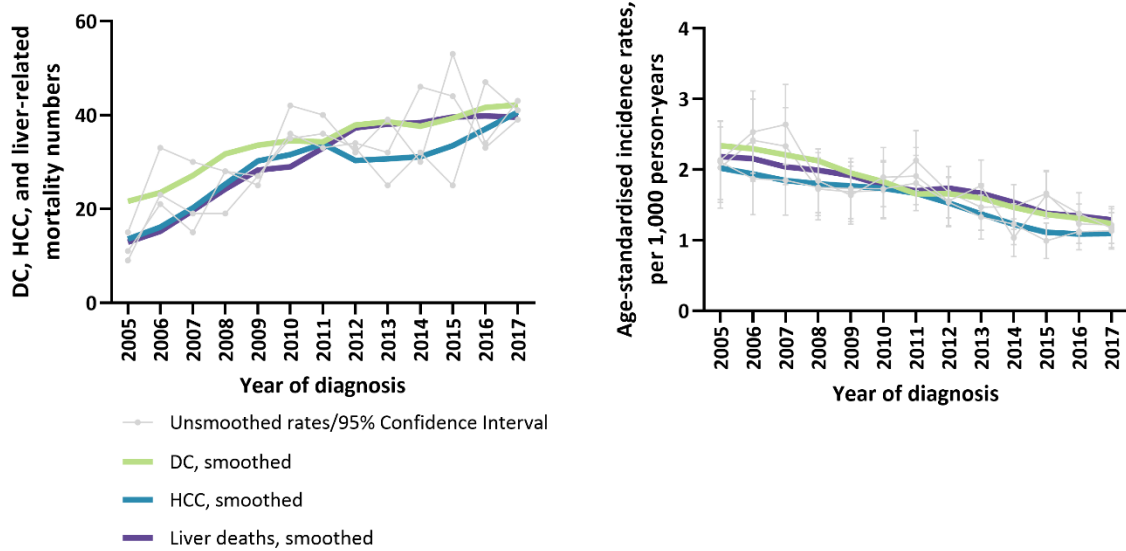

**Fig. S2. Sensitivity analysis of HCC diagnosis (hospitalisation data and cancer registry data)**

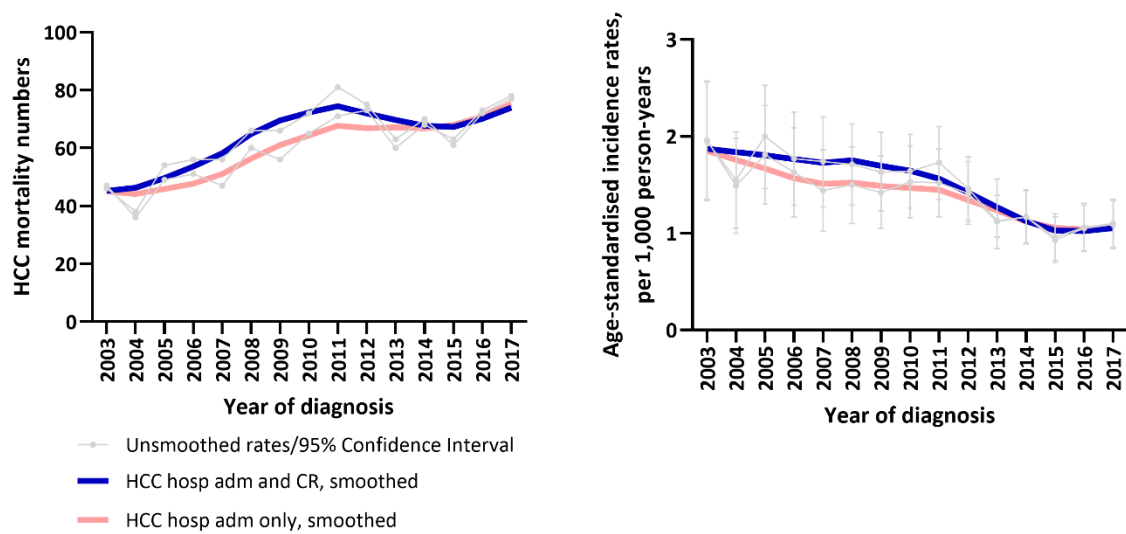

\* The 2003-2017 was only chosen for visual display of data and study period was 2001-2018
